# Supplementary material for: Comparison of transient associations of air pollution and AMI hospitalisation in two cities of Alberta, Canada, using a case-crossover design
Source: HighWire-hosted journal article supplement (doi:10.1136/bmjopen-2015-009169), 2015-11-01

# Calgary Forward Sortation Areas

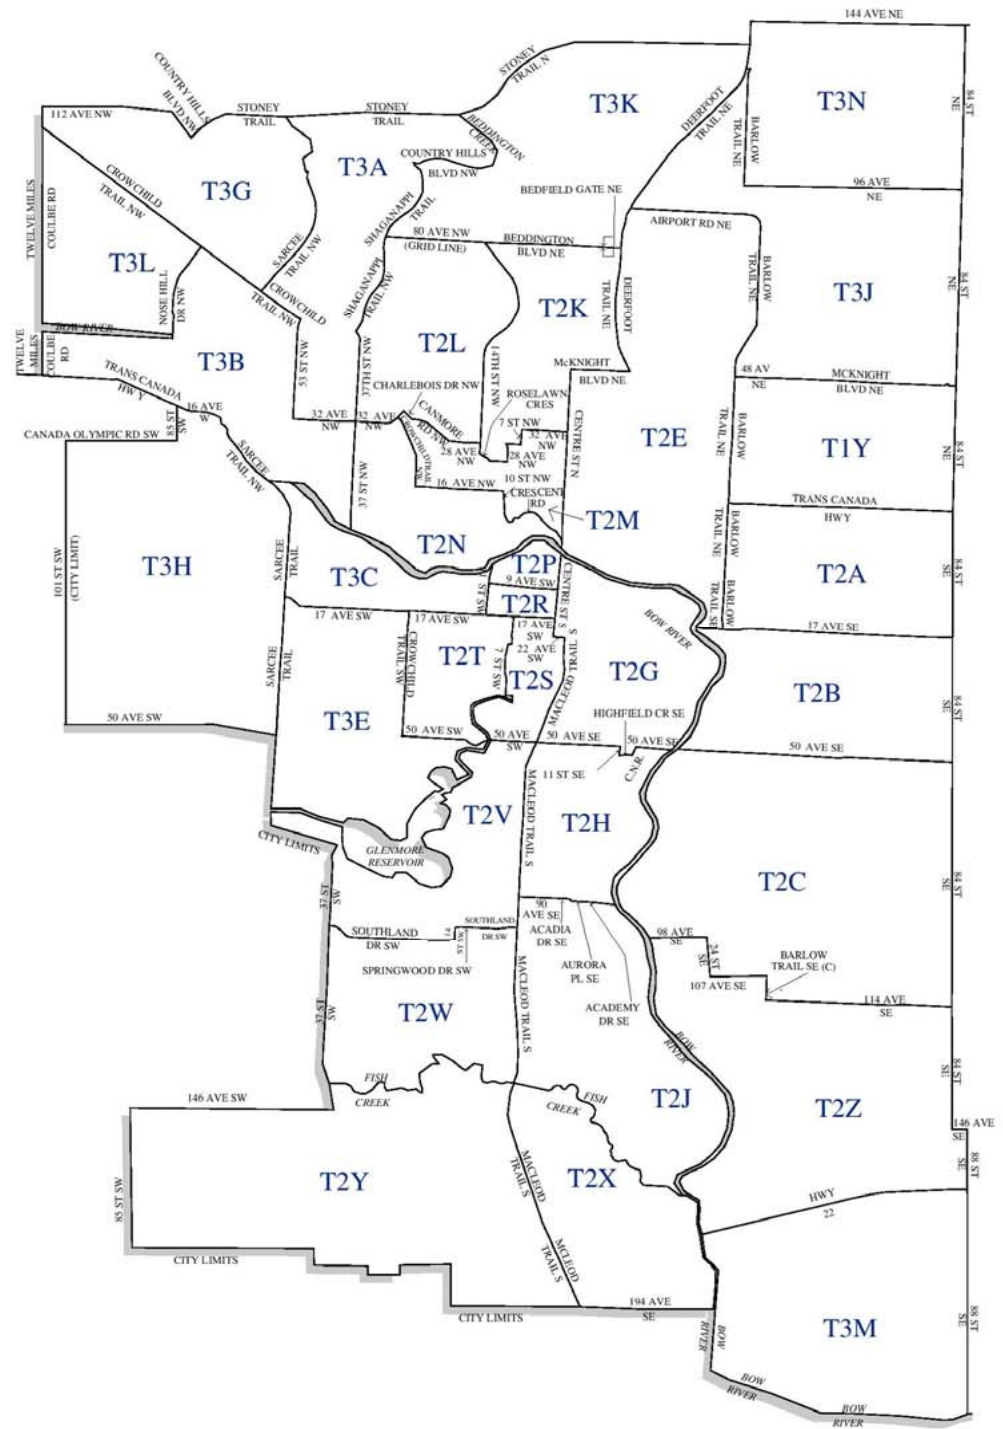

SCALE / ÉCHELLE 1:200 000

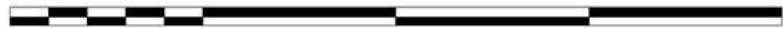

Metres 5000 0 5000 10000 15000 Metres  
248180

# Edmonton Forward Sortation Areas

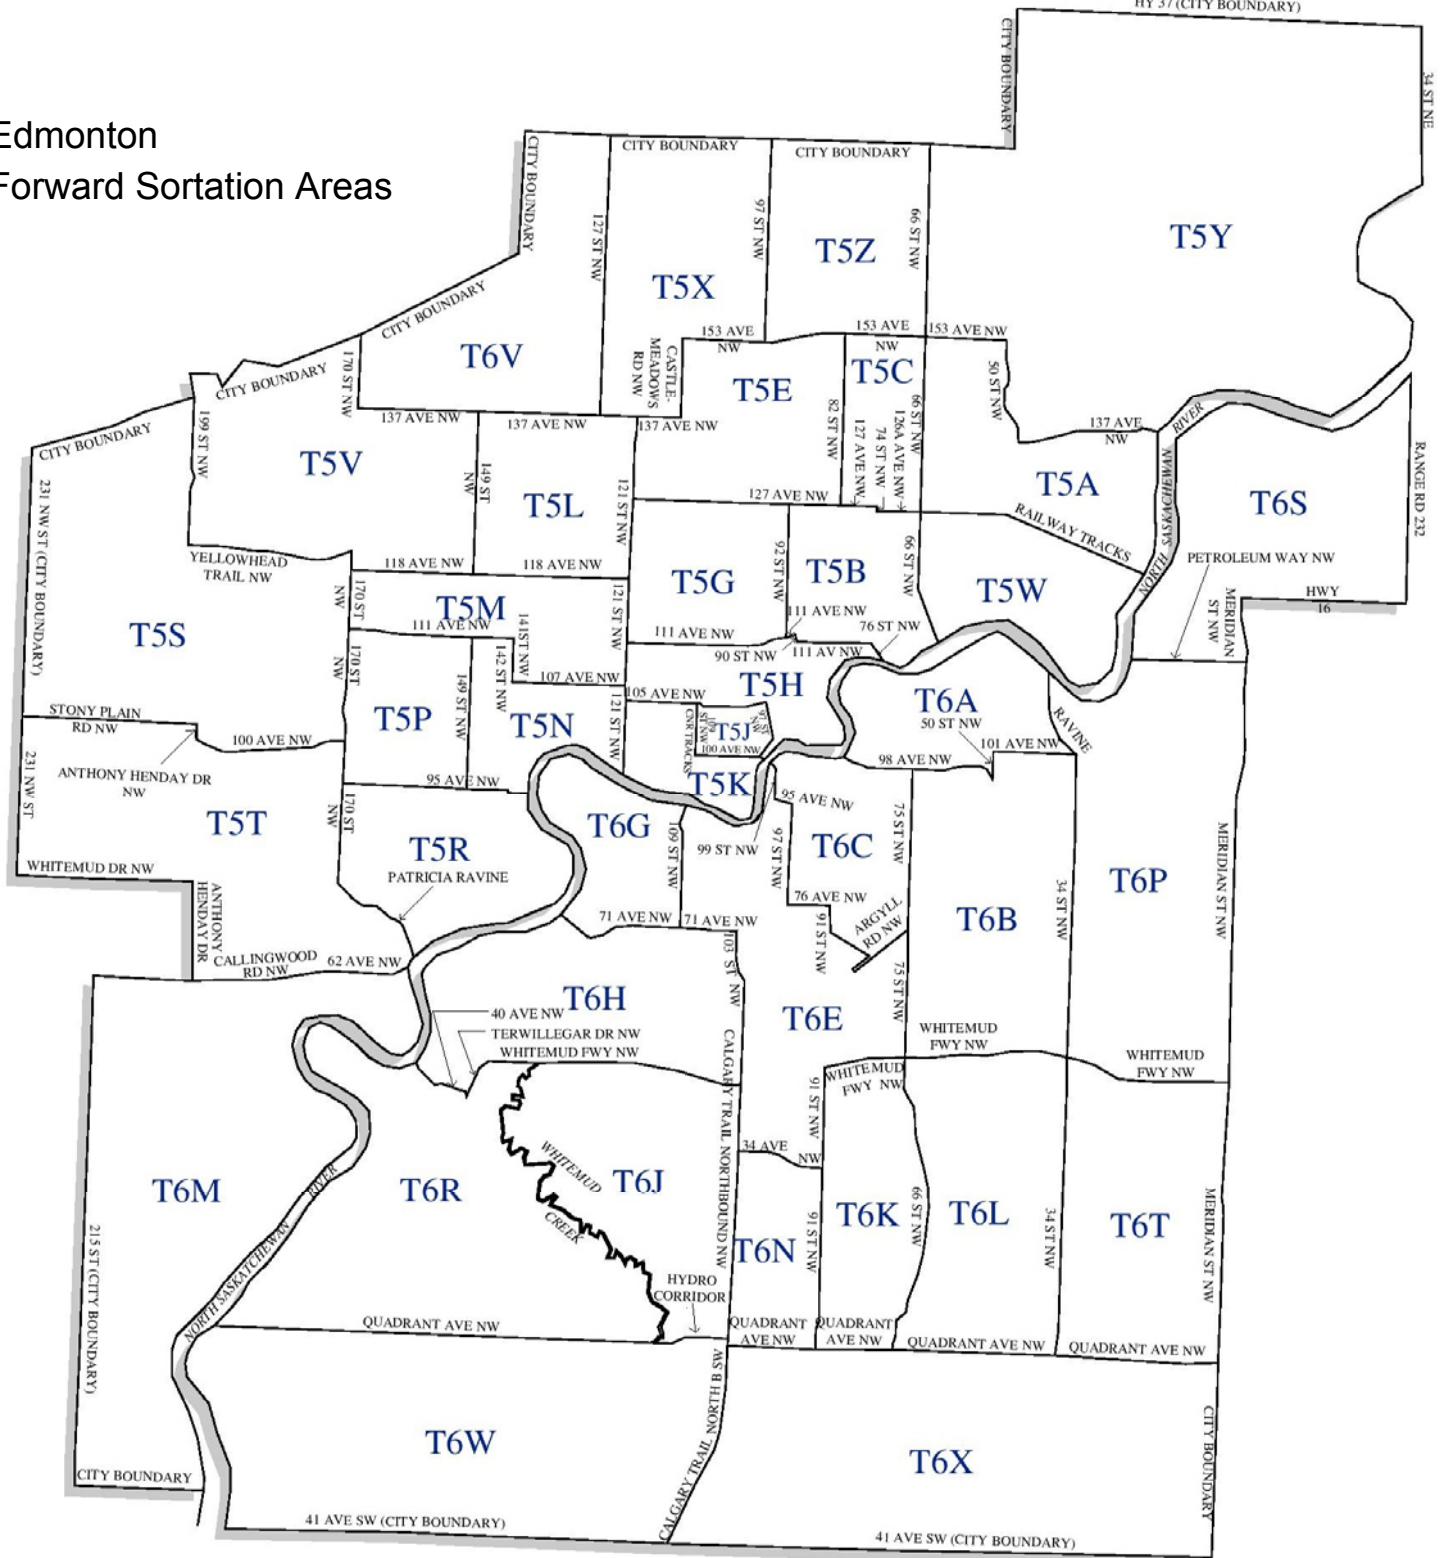

SCALE / ÉCHELLE 1:200 000

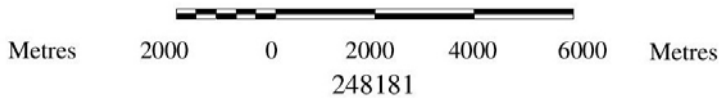

Supplement: bmjopen-2015-009169supp1.pdf [file bmjopen-2015-009169supp1.pdf]
